# Supplementary material for: The Fungal Effector Avr-Pita Suppresses Innate Immunity by Increasing COX Activity in Rice Mitochondria
Source: PubMed Central journal article supplement (PMC7809080; doi:10.1186/s12284-021-00453-4), 2021-01-14
Supplement: 12284_2021_453_MOESM1_ESM.pdf [file 12284_2021_453_MOESM1_ESM.pdf]

## Supplementary Information

### The Fungal Effector Avr-Pita Suppresses Innate Immunity by Increasing COX Activity in Rice Mitochondria

Jingluan Han<sup>1,2,3#</sup>, Xiaoyu Wang<sup>1,3#</sup>, Fengpin Wang<sup>1,3#</sup>, Zhe Zhao<sup>1,2,3</sup>, Gousi Li<sup>1,3</sup>, Xiaoyuan Zhu<sup>4</sup>, Jing Su<sup>4\*</sup>, and Letian Chen<sup>1,2,3\*</sup>

#### Supplementary Figures

**Fig. S1 Ectopic expression of *Avr-Pita* in rice.**

**Fig. S2 Avr-Pita specifically binds to the conserved domains of OsCOX11.**

**Fig. S3 Avr-Pita and OsCOX11 co-localize to the mitochondria in onion epidermal cells.**

**Fig. S4 Characterization of *OsCOX11* transgenic plants and pathogen resistance of *OsCOX11*-RNAi plants.**

**Fig. S5 *OsCOX11* expression in response to chitin and *M. oryzae* treatment.**

#### Supplementary Tables

**Table. S1 Candidates of Avr-Pita interacting protein screened by Y2H.**

**Table. S2 Primers used in this study.**

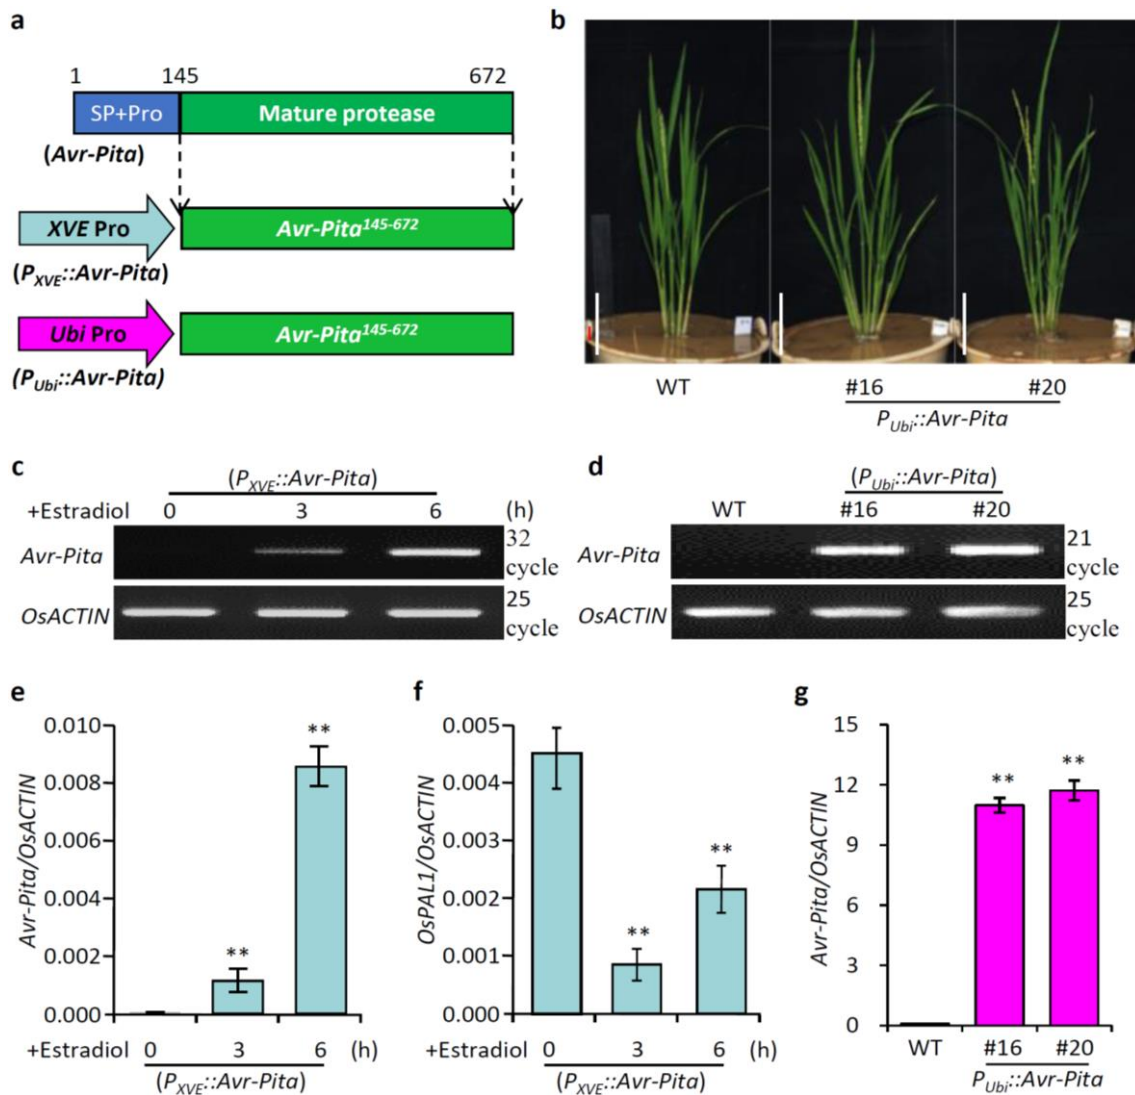

**Fig. S1 Ectopic expression of *Avr-Pita* in rice.**

(a) Diagram of the *P*<sub>XVE</sub>::*Avr-Pita* and *P*<sub>Ubi</sub>::*Avr-Pita* constructs. In these constructs, a truncated *Avr-Pita*<sup>145-672</sup> fragment encoding mature protease is driven by the estradiol-inducible promoter *XVE* or the maize *Ubiquitin* (*Ubi*) promoter. SP: signal peptide; Pro: predicted prosequence. (b) The growth and developmental morphology of *P*<sub>ubi</sub>::*Avr-Pita* plants were not obviously affected in these lines. Scale bars: 10 cm. (c) Transcript levels of *Avr-Pita* was measured by RT-PCR in *P*<sub>XVE</sub>::*Avr-Pita* transgenic suspension cell lines after estradiol treatment. (d) Transcript levels of *Avr-Pita* was measured by RT-PCR in *P*<sub>ubi</sub>::*Avr-Pita* transgenic lines. (e) The expression of *Avr-Pita* in *P*<sub>XVE</sub>::*Avr-Pita* transgenic suspension cell lines after estradiol treatment using qRT-PCR. (f) The expression of defense-response gene *OsPAL1* in *P*<sub>XVE</sub>::*Avr-Pita* suspension cell lines after estradiol treatment using qRT-PCR. (g) Overexpression of *Avr-Pita* in *P*<sub>ubi</sub>::*Avr-Pita* transgenic lines using qRT-PCR. *OsACTIN* served as a control to normalize the expression levels of target genes. Data are shown as mean ± SD (\*\**P* < 0.01, *n* = 3).

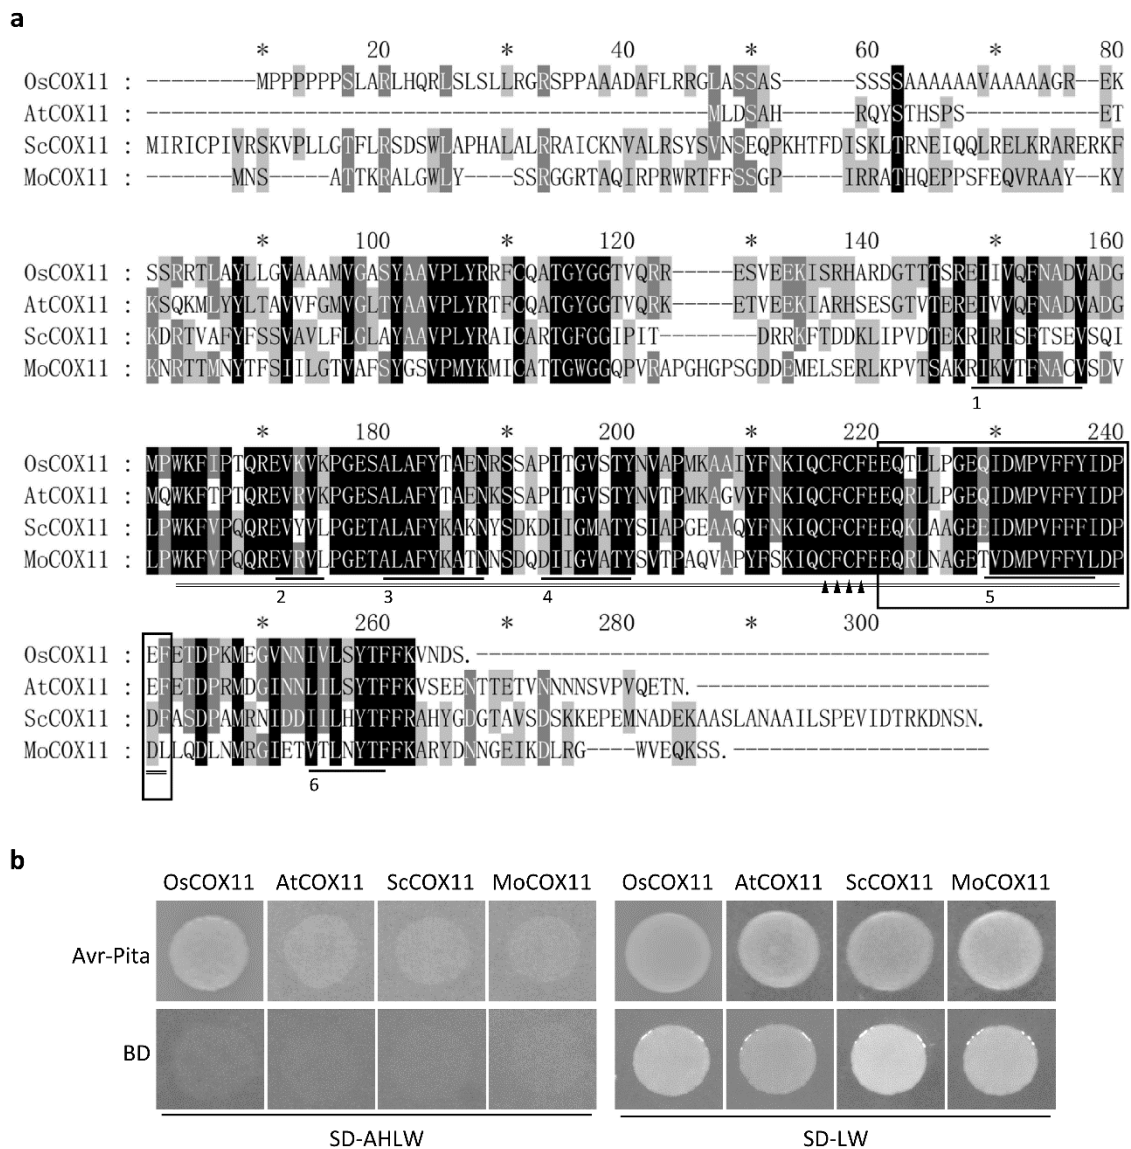

**Fig. S2 Avr-Pita specifically binds to the conserved domains of OsCOX11.**

(a) Amino acid sequence alignment of COX11 orthologs OsCOX11 (*O. sativa*, XP\_006650503.1), AtCOX11 (*A. thaliana*, AAG00893), ScCOX11 (*S. cerevisiae*, NP\_015193), and MoCOX11 (*M. oryzae*, XP\_003717808). Six  $\beta$  sheets (indicated by a single underline and numbered 1–6) and Cu-binding core region CFCF (indicated by four triangles  $\blacktriangle$ ) are present in the conserved region of COX11. Residues 140–220 of OsCOX11, which are responsible for the interaction with Avr-Pita, are double underlined. The critical region OsCOX11<sup>199–220</sup> is labelled with boxes. (b) Avr-Pita specifically interacts with rice OsCOX11 in a Y2H assay. Yeast cells were cultured on selective medium SD-LW or SD-AHLW; cell growth on SD-AHLW indicates a positive interaction.

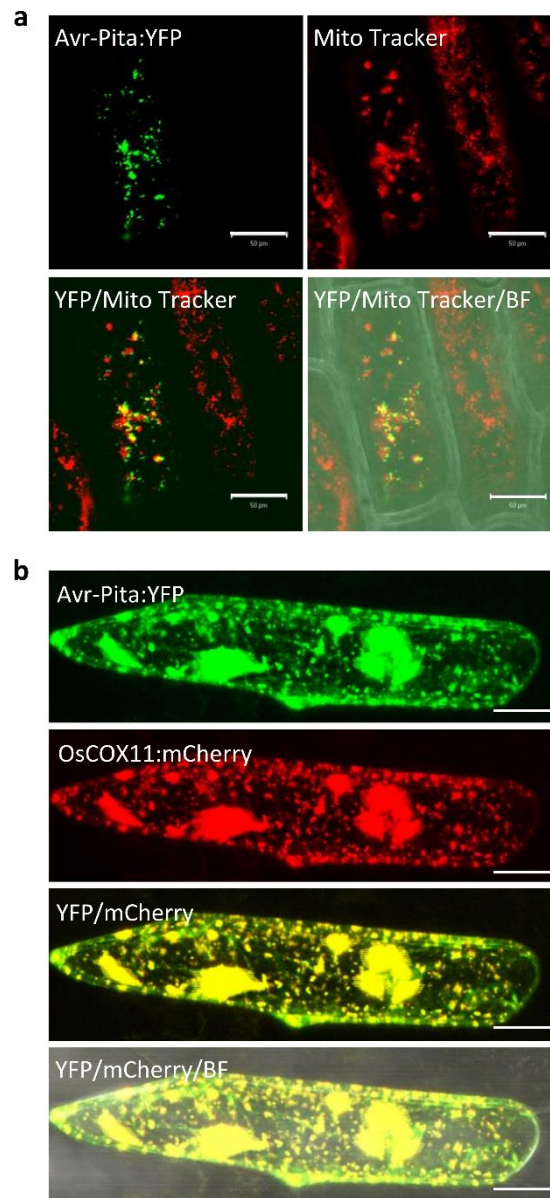

**Fig. S3 Avr-Pita and OsCOX11 co-localize to the mitochondria in onion epidermal cells.**

(a) *Avr-Pita:YFP* was introduced into onion epidermal cells by particle bombardment and stained with the mitochondrial dye MitoTracker. (b) *Avr-Pita:YFP* and *OsCOX11:mCherry* were transiently introduced into onion epidermal cells by particle bombardment. Scale bar = 50  $\mu\text{m}$ .

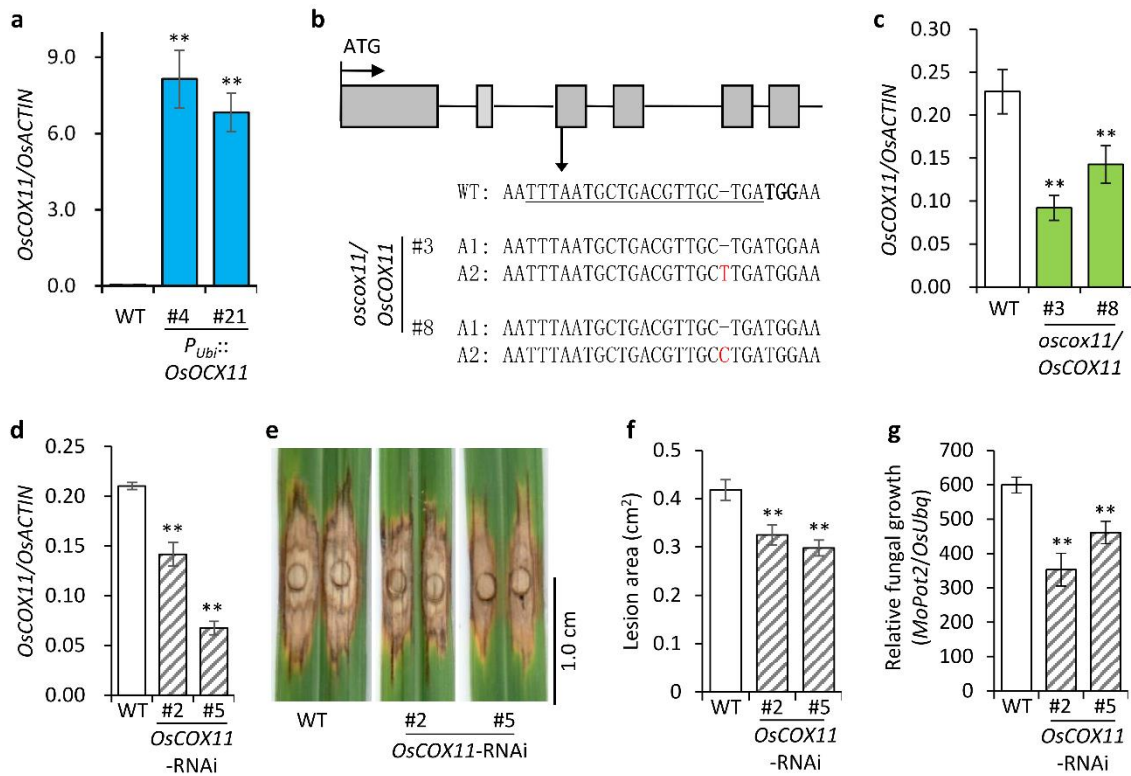

**Fig. S4 Characterization of *OsCOX11* transgenic plants and pathogen resistance of *OsCOX11*-RNAi plants.**

(a) Expression levels of *OsCOX11* in *P<sub>Ubi</sub>::OsCOX11* lines; *OsACTIN* served as an internal control. Data are shown as mean  $\pm$  SD (\*\* $P < 0.01$ ,  $n = 3$ ). (b) Genotypes of heterozygous *oscox11/OsCOX11* lines carrying a “T” or “C” base insertion. (c) Expression levels of *OsCOX11* in *oscox11/OsCOX11* plants. *OsACTIN* served as an internal control. Data are shown as mean  $\pm$  SD (\*\* $P < 0.01$ ,  $n = 3$ ). (d) Expression levels of *OsCOX11* in *OsCOX11*-RNAi plants. *OsACTIN* served as an internal control. Data are shown as mean  $\pm$  SD (\*\* $P < 0.01$ ,  $n = 3$ ). (e) Disease symptoms of *OsCOX11*-RNAi transgenic plants at 12 dpi inoculated with *M. oryzae* isolate 13-219. (f) Lesion area in *OsCOX11*-RNAi transgenic plants at 12 dpi inoculated with *M. oryzae* isolate 13-219. Data are shown as mean  $\pm$  SD (\*\* $P < 0.01$ ,  $n > 12$ ). (g) Relative fungal biomass on inoculated leaves at 12 dpi, as determined by qPCR. Data are shown as mean  $\pm$  SD (\*\* $P < 0.01$ ,  $n = 3$ ).

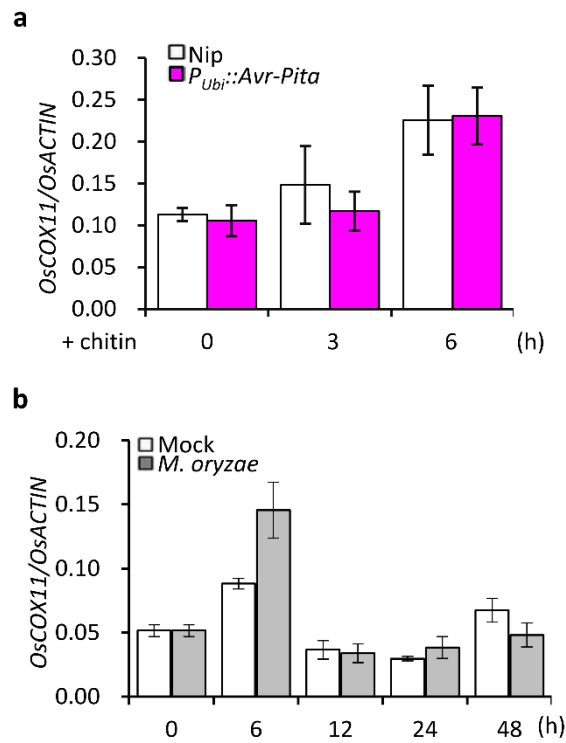

**Fig. S5 *OsCOX11* expression in response to chitin and *M. oryzae* treatment.**

**(a)** The expression levels of *OsCOX11* in *P<sub>Ubi</sub>::Avr-Pita* and WT plants after chitin treatment. **(b)** The expression levels of *OsCOX11* in rice seedlings in response to *M. oryzae* compatible strain 08-T13 inoculation at the indicated time points. *OsACTIN* served as an internal control. Data are shown as mean  $\pm$  SD (\*\* $P < 0.01$ ,  $n = 3$ ).

**Table. S1 Candidates of Avr-Pita interacting protein screened by Y2H.**

| <b>Gene ID</b> | <b>Predicted Function</b>                   |
|----------------|---------------------------------------------|
| Os01g0127500   | Dihydroflavonol-4-reductase                 |
| Os01g0531500   | Dienelactone hydrolase family protein       |
| Os03g0718600   | Cytochrome c oxidase assembly protein COX11 |
| Os08g0532900   | Emp24/gp25L/p24 family protein              |
| Os06g0149900   | Cysteine synthase                           |
| Os11g0171300   | Fructose-bisphosphate aldolase isozyme      |

**Table. S2 Primers used in this study.**

| <b>Primer Name</b>           | <b>Sequence (5' — 3')</b>            |
|------------------------------|--------------------------------------|
| <b>Genetic modification</b>  |                                      |
| P <sub>XVE</sub> -Avr-Pita-F | TCGACCTGCAGATGCGCTATTCCCAATGTTCA     |
| P <sub>XVE</sub> -Avr-Pita-R | CATGCCTGCAGTTAACAATATTATAACGTGC      |
| P <sub>ubi</sub> -Avr-Pita-F | TCGACCTGCAGATGGAACGCTATTCCCAATGTTCA  |
| P <sub>ubi</sub> -Avr-Pita-R | TCAGGATCCTTAACAATATTATAACGTGC        |
| P <sub>ubi</sub> -OsCOX11-F  | ACTTGGATCCATGCCGCCGCCGCCGCCGCTTCGTT  |
| P <sub>ubi</sub> -OsCOX11-R  | TCAGGATCCTTAACTGTGCTTCACCTTAAAGA     |
| OsCOX11-U6b                  | TCAGCAACGTCAGCATTAAACAACACAAGCGGCAGC |
| OsCOX11-gRNA                 | TTAATGCTGACGTTGCTGAGTTTTAGAGCTAGAAAT |
| OsCOX11-Ri-1F                | TTACGGTACCATGGATGCTCAGCGAACTAGTC     |
| OsCOX11-Ri-1R                | CATGGTACCGTACACTCACTGCCTTAAAG        |
| OsCOX11-Ri-2F                | CATGGTACCGCTGAGGGTAAATTTCTAGT        |
| OsCOX11-Ri-2R                | TTGCGGATCCTCAGCTGAGACATCACT          |
| <b>Genotyping</b>            |                                      |
| OsCOX11-In2Ex4-F             | TGGAATAGCCATACAGCC                   |
| OsCOX11-In2Ex4-R             | CCTTCATAGGAGCTACGTTATATGTG           |
| OsCOX11-seq-F                | GCAAATTTGCTGTAATCATGGGCTAA           |
| <b>qPCR</b>                  |                                      |
| Avr-Pita-qF                  | CCTCCTTTCTTCAACAACCC                 |
| Avr-Pita-qR                  | CCATCCCATTTCGTAACCA                  |
| OsCOX11-qF                   | CAACACAGAGAGAAGTGAAGGT               |
| OsCOX11-qR                   | GTGGATACACCAGTTATTGGAG               |
| OsPAL1-qF                    | CCTGCCAATCTGCTGAACTA                 |
| OsPAL1-qR                    | TTTGAAACCTGCCACTCGTA                 |
| OsPBZ1-qF                    | CCGAATACGCCTAAGATGAA                 |
| OsPBZ1-qR                    | TCTCACGGACTCAAACGC                   |
| OsPR10-qF                    | AGGACTACCTCGTCGCTCA                  |
| OsPR10-qR                    | TTGGATTTGTCGTGGCTC                   |
| OsActin-qF                   | GCATCTCTCAGCACATTCCA                 |
| OsActin-qR                   | ACCACAGGTAGCAATAGGTA                 |
| OsUbi-qF                     | TTCTGGTCCTTCCACTTTCAG                |



---

|           |                          |
|-----------|--------------------------|
| OsUbi-qR  | ACGATTGATTTAACCAGTCCATGA |
| MoPot2-qF | ACGACCCGTCTTTACTTATTTGG  |
| MoPot2-qR | AAGTAGCGTTGGTTTTGTTGGAT  |

### **Protein subcellular localization**

|                |                                |
|----------------|--------------------------------|
| Avr-Pita-YFP-F | TACTAAGCTTATGGAACGCTATTCCCAATG |
| Avr-Pita-YFP-R | TCAGGATCCCACAATATTTATAACGTGC   |
| OsCOX11-mCh-F  | CATGAAGCTTATGCCGCCGCCGCCGCCGC  |
| OsCOX11-mCh-R  | TCAGGATCCCCTGTCGTTACCTTAAAGA   |

### **Yeast two-hybrid**

|                                  |                                           |
|----------------------------------|-------------------------------------------|
| BD-Avr-Pita-F                    | TACCATATGGAACGCTATTCCCAATGTTTCAGA         |
| BD-Avr-Pita-R                    | TCAGGATCCTTAACAATATTTATAACGTGC            |
| AD-OsCOX11-F                     | ACTTCATATGATGCCGCCGCCGCCGCCGC             |
| AD-OsCOX11-R                     | TCAGGATCCTTAACTGTCGTTACCTTAAAGA           |
| AD-AtCOX11-F                     | GTACTGGAATTCATGTTAGATAGTGCCCATCGCC        |
| AD-AtCOX11-R                     | CTGAGTCTCGAGTTAATTGGTTTCTTGAAGTGA         |
| AD-ScCOX11-F                     | CGACGGATCCGTATGATAAGAATATGTCCCATTGTTAG    |
| AD-SsCOX11-R                     | CTATGGATCCTTAATTTGAGTTGTCTTTCCTTGTGTC     |
| AD-MoCOX11-F                     | ACGTTGGAATTCATGAACTCAGCAACGACGAAGC        |
| AD-MoCOX11-R                     | GGATCTCTCGAGCTATGAGCTCTTCTGCTCCACC        |
| AD-OsCOX11 <sup>1-198</sup> -F   | ATGTTTTTGCTTTGAGGATCCATCGAGCTCGAGCTGCAGAT |
| AD-OsCOX11 <sup>1-198</sup> -R   | TCGAGCTCGATGGATCCTCAAAGCAAAAACATTGTATCTTA |
| AD-OsCOX11 <sup>80-220</sup> -F  | CATCGATCCTGAGTTTGGATCCATCGAGCTCGAGCTGCAGA |
| AD-OsCOX11 <sup>80-220</sup> -R  | CGAGCTCGATGGATCCAAACTCAGGATCGATGTAGAAGAAC |
| AD-OsCOX11 <sup>110-220</sup> -F | AGATTACGCTCATATGGAGGAGAAGATCTCACGACATGCTC |
| AD-OsCOX11 <sup>110-220</sup> -R | GTGAGATCTTCTCCTCCATATGAGCGTAATCTGGTACGTCG |
| AD-OsCOX11 <sup>140-244</sup> -F | AGATTACGCTCATATGCCGTGGAAATTCATTCCAACACAGA |
| AD-OsCOX11 <sup>140-244</sup> -R | GAATGAATTTCCACGGCATATGAGCGTAATCTGGTACGTCG |

### **Pull-down**

|                |                                                |
|----------------|------------------------------------------------|
| GST-Avr-Pita-F | CTGGTTCCGCGTGGATCCCCAGGAGAACGCTATTCCCAATGTTCA  |
| GST-Avr-Pita-R | TCACGATGCGGCCGCTCGAGTCGATTAACAATATTTATAACGTGC  |
| His-OsCOX11-F  | ATGGCTGATATCGGATCCGAATCCCGCCGCCGCCGCCGC        |
| His-OsCOX11-R  | TCGAGTGCGCCGCAAGCTTGTCTGTTAACTGTCGTTACCTTAAAGA |

---
